# Supplementary material for: Novel glycolipid agents for killing cisplatin-resistant human epithelial ovarian cancer cells
Source: Springer Nature journal article supplement (doi:10.1186/s13046-017-0538-9), 2017-05-12
Supplement: MOESM1 [file 12285264]

## Supplementary Material

Supplemental Table 1. Primary EOC patient sample histological diagnosis, surgical staging and/or chemotherapy resistance status, and CA-125 levels at time of cell sampling.

| <b>Sample</b>  | <b>Histotype</b>                             | <b>Staging/Chemo status</b>                                          | <b>CA-125 at time of sampling</b> |
|----------------|----------------------------------------------|----------------------------------------------------------------------|-----------------------------------|
| <b>EOC013F</b> | Ovarian adenocarcinoma                       | Stage IIIC. High grade.                                              | Not available                     |
| <b>EOC016B</b> | Ovarian adenocarcinoma                       | Chemonaïve                                                           | 755                               |
| <b>EOC016H</b> | Ovarian adenocarcinoma                       | Recurrent, platinum resistant; sample obtained 10 weeks after EOC16B | 4560                              |
| <b>EOC058</b>  | Ovarian high grade serous adenocarcinoma     | Stage IIIC; Chemonaïve                                               | 284                               |
| <b>EOC061</b>  | Ovarian high grade serous adenocarcinoma     | Not available                                                        | Not available                     |
| <b>EOC126</b>  | Ovarian clear cell adenocarcinoma            | Stage II; Chemonaïve                                                 | 977                               |
| <b>EOC140</b>  | Ovarian high grade serous cystadenocarcinoma | Stage IIIC; recurrent, platinum resistant                            | 50                                |
| <b>EOC146</b>  | Ovarian high grade serous cystadenocarcinoma | Stage IIIC; recurrent, platinum resistant                            | 787                               |
| <b>EOC183A</b> | Ovarian high grade serous adenocarcinoma     | Stage IIIC; recurrent, platinum resistant                            | 469                               |
| <b>EOC183I</b> | Ovarian high grade serous adenocarcinoma     | Stage IIIC; recurrent, platinum resistant                            | 376                               |
