# Supplementary material for: Novel glycolipid agents for killing cisplatin-resistant human epithelial ovarian cancer cells
Source: Springer Nature journal article supplement (doi:10.1186/s13046-017-0538-9), 2017-05-12

EOC cells direct from ascites  
(arrows indicate cell aggregates)

A.

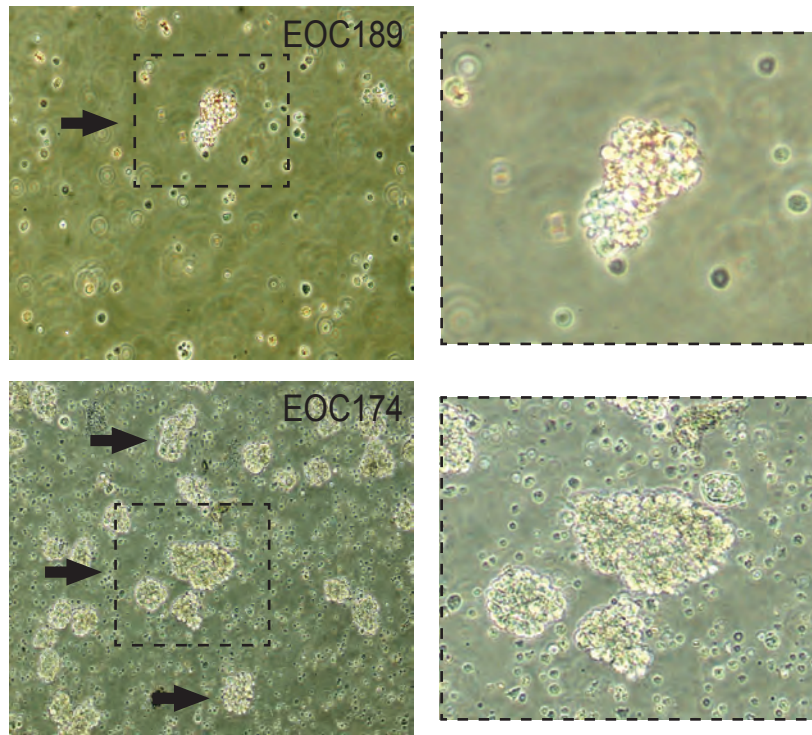

B.

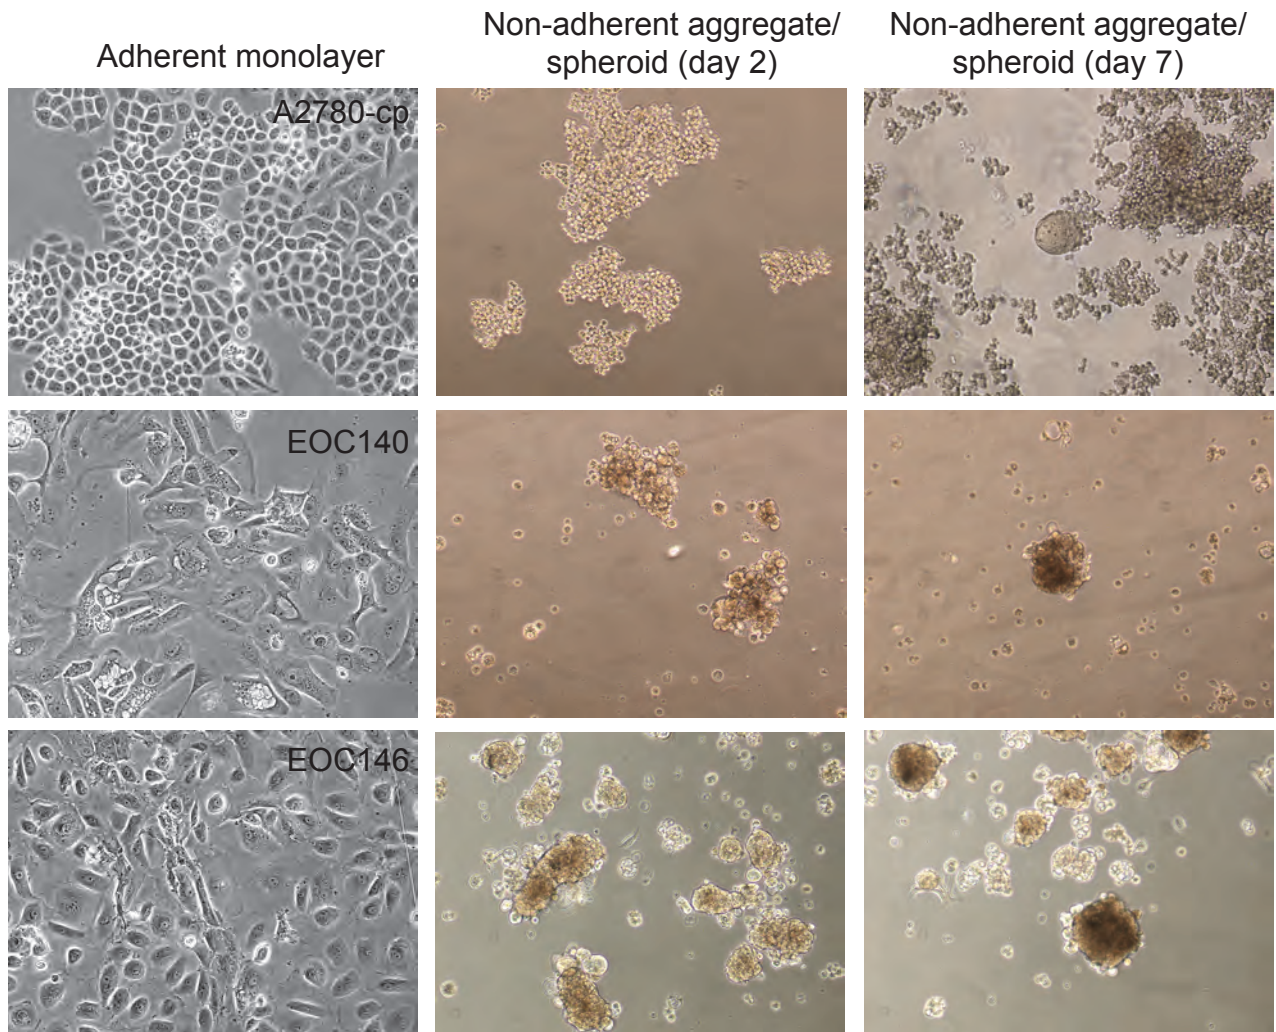

Supplement: MOESM3 [file 12285264]
