# Supplementary material for: Novel glycolipid agents for killing cisplatin-resistant human epithelial ovarian cancer cells
Source: Springer Nature journal article supplement (doi:10.1186/s13046-017-0538-9), 2017-05-12

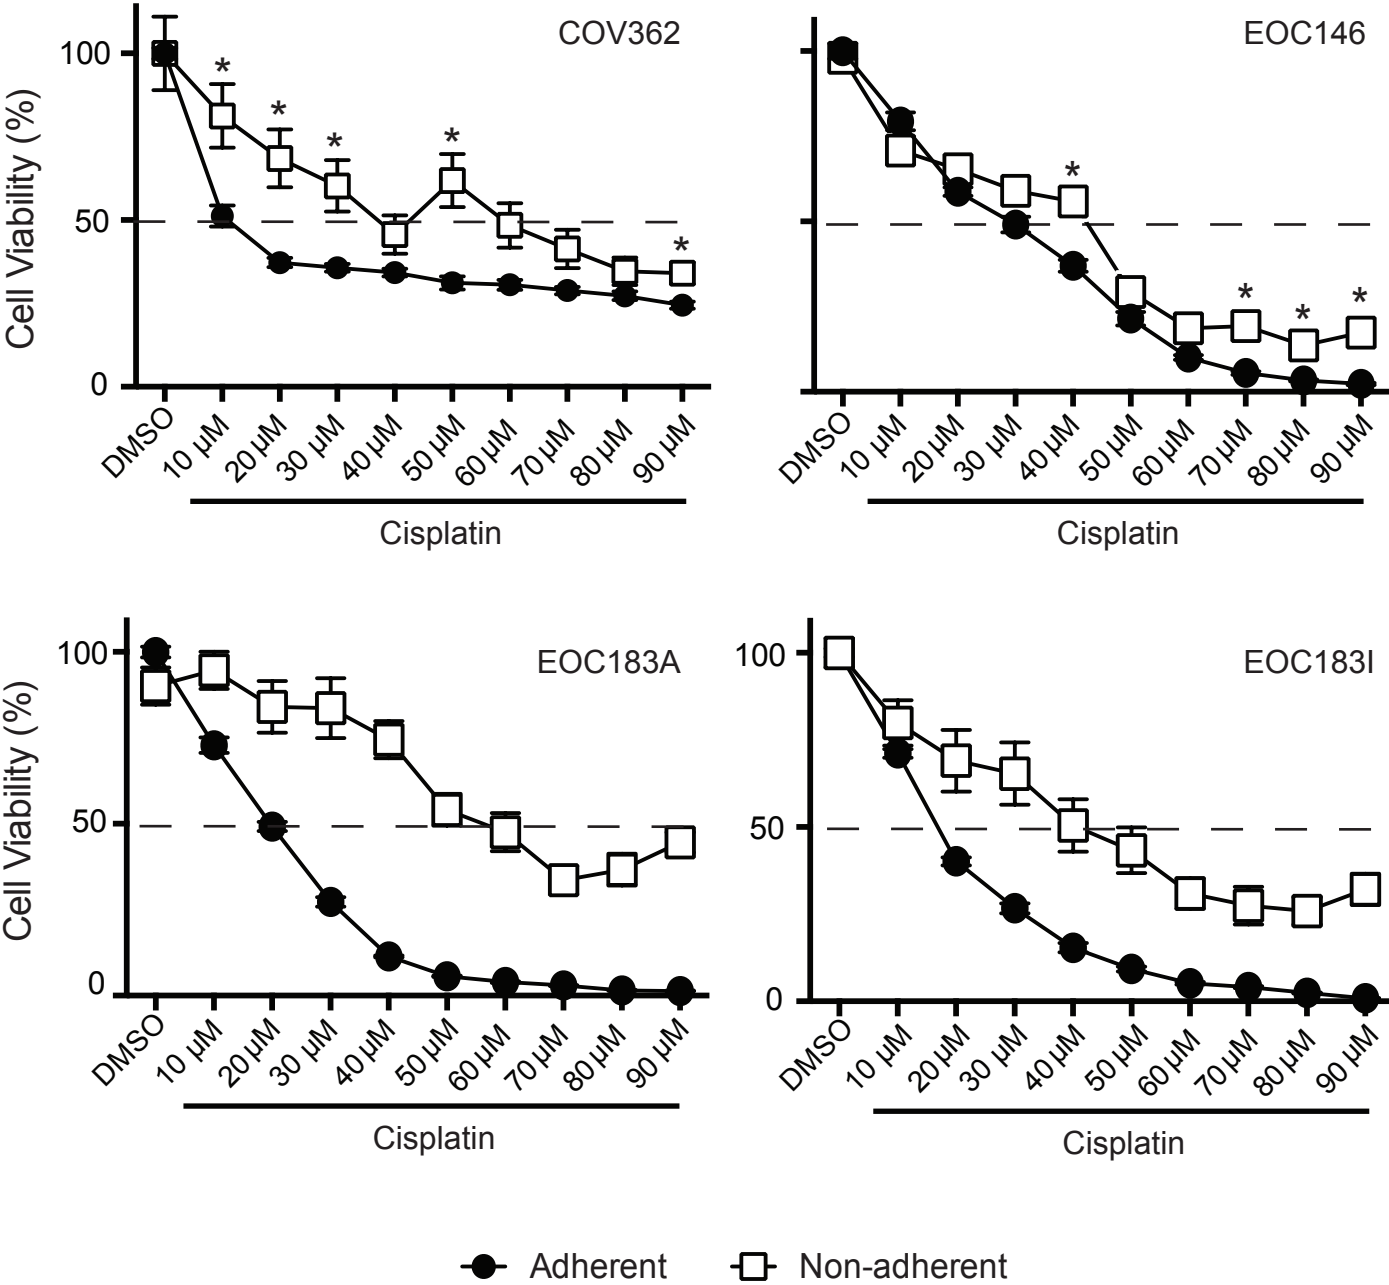

Supplement: MOESM5 [file 12285264]
